# A propensity score matching analysis of survival following segmentectomy or wedge resection in early-stage lung invasive adenocarcinoma or squamous cell carcinoma

Yang Zhang<sup>1,2</sup>, Yihua Sun<sup>1,2</sup>, Haiquan Chen<sup>1,2,3,4</sup>

<sup>1</sup>Department of Thoracic Surgery, Fudan University Shanghai Cancer Center, Shanghai, China

<sup>2</sup>Department of Oncology, Shanghai Medical College, Fudan University, Shanghai, China

<sup>3</sup>Shanghai Chest Hospital, Shanghai Jiao Tong University, China

<sup>4</sup>Institutes of Biomedical Sciences, Fudan University, Shanghai, China

Correspondence to: Haiquan Chen, e-mail: hqchen1@yahoo.com  
Yihua Sun, e-mail: Sun\_yihua76@hotmail.com

Keywords: non-small cell lung cancer, wedge resection, segmentectomy, survival outcomes

Received: October 17, 2015

Accepted: January 28, 2016

Published: February 9, 2016

## ABSTRACT

**Purpose:** To compare the survival outcomes following segmentectomy or wedge resection in early-stage lung cancer.

**Methods:** A total of 5880 patients with invasive lung adenocarcinoma or squamous cell carcinoma from the Surveillance, Epidemiology, and End Results (SEER) database were included in this study, of which 1156 received segmentectomy. Baseline characteristics were balanced using propensity score methods. Cox regression analysis was used to compare overall survival (OS) and lung cancer-specific survival (LCSS) following segmentectomy or wedge resection after matching patients based on propensity scores.

**Results:** Overall, patients undergoing segmentectomy and wedge resection had no significant different OS and LCSS both in the invasive adenocarcinoma group and the squamous cell carcinoma group. Segmentectomy was associated with improved OS (hazard ratio = 0.626, 95% confidence interval: 0.457-0.858,  $P = 0.004$ ) and LCSS (hazard ratio = 0.643, 95% CI: 0.440-0.939,  $P = 0.022$ ) in invasive adenocarcinoma patients  $\leq 65$  years old. In patients with  $\leq 2$  cm invasive adenocarcinoma, segmentectomy was associated with significantly better OS (hazard ratio = 0.811, 95% confidence interval: 0.666-0.988,  $P = 0.038$ ).

**Conclusion:** Survival following segmentectomy or wedge resection was generally equivalent in lung invasive adenocarcinoma and squamous cell carcinoma. However, invasive adenocarcinoma patients who were  $\leq 65$  years or had tumors  $\leq 2$  cm in size may have improved survival outcomes after segmentectomy.

## INTRODUCTION

The National Lung Screening Trial (NLST) results encouraged the early detection of lung cancer by computed tomography (CT) screen [1]. In 1995, the Lung Cancer Study Group (LCSG) published the only randomized clinical trial on surgical approaches for stage IA non-small cell lung cancer (NSCLC) [2]. This trial demonstrated that lobectomy was associated with improved survival outcomes compared to limited resection (segmentectomy and wedge resection) [2]. Since then, a number of non-

randomized studies, especially studies from Japan, showed equivalent efficacy with limited resection in selected early stage NSCLC [3-7]. A recent study further found that the equivalency of limited resection versus lobectomy varies with tumor histology (ie, invasive adenocarcinoma and squamous cell carcinoma) [8]. However, only a few studies compared the efficacy between the two sublobar resection types, segmentectomy and wedge resection, providing insufficient evidence regarding selection of appropriate limited resection types in early stage lung cancer [5, 6, 9, 10].

In this study, we used the Surveillance, Epidemiology, and End Results (SEER) database to investigate the survival outcomes following segmentectomy versus wedge resection in stage I  $\leq 3$  cm lung invasive adenocarcinoma and squamous cell carcinoma.

## RESULTS

A total of 5880 patients with invasive lung adenocarcinoma or squamous cell carcinoma were included in this study, of which 1156 received segmentectomy. Among patients with invasive lung adenocarcinoma, patients undergoing segmentectomy were more likely to be female, had a larger tumor size, had tumors located in the lower lobe, had more lymph nodes examined, and were less likely to receive postoperative radiation therapy. Patients with squamous cell carcinoma receiving segmentectomy were also associated with a larger tumor size, more lymph nodes examined and a lower tendency to receive postoperative radiation therapy. Detailed patient characteristics were listed in Table 1. After adjustment for propensity scores, baseline characteristics were well balanced among patients receiving segmentectomy or wedge resection.

In the propensity score-matched analysis, patients undergoing segmentectomy and wedge resection had no significant different OS and LCSS both in the invasive adenocarcinoma group and the squamous cell carcinoma group (Table 2). We further performed subgroup analysis according to age and tumor size. Segmentectomy was associated with improved OS (HR = 0.626, 95% CI: 0.457-0.858,  $P = 0.004$ ) and LCSS (HR = 0.643, 95% CI: 0.440-0.939,  $P = 0.022$ ) in invasive adenocarcinoma patients  $\leq 65$  years old. In patients with  $\leq 2$  cm invasive adenocarcinoma, segmentectomy was associated with significantly better OS (HR = 0.811, 95% CI: 0.666-0.988,  $P = 0.038$ ) and a tendency towards better LCSS (HR = 0.813, 95% CI: 0.632-1.047,  $P = 0.109$ ). OS and LCSS were not significantly different between the two resection types in invasive adenocarcinoma patients older than 65 years or had tumors 2-3cm in size. Squamous cell carcinoma patients receiving segmentectomy or wedge resection had comparable OS and LCSS in all the subgroup analysis.

## DISCUSSION

Although the only published RCT supported the superiority of lobectomy over limited resection in T1N0 NSCLC [2], there is increasing evidence indicating an equivalent efficacy of sublobar resection (segmentectomy or wedge resection) in selected early-stage patients [3-7]. Compared to segmentectomy, wedge resection is technically a much simpler approach including the resection of lung tumor as well as the surrounding normal lung tissues. However, segmentectomy is still preferred

by many surgeons as it is considered to be an anatomical resection with more extensive lymph nodes dissection. Currently, only a few studies compared the survival outcomes following segmentectomy or wedge resection, with relatively smaller samples and conflicting results [5, 6, 9, 10]. Therefore, we undertook this population-based study to investigate the efficacy of these two sublobar resection types after propensity score matching and stratified the analysis in invasive adenocarcinoma and squamous cell carcinoma.

The OS and LCSS were comparable between the two groups when the whole cohort of invasive adenocarcinoma patients were analyzed. Segmentectomy was associated with improved OS and LCSS in invasive adenocarcinoma patients 65 years or younger, but not in the group of patients older than 65 years. Young patients with lung cancer generally have better overall survival as well as lung-cancer specific survival than their older counterparts [14, 15]. Since elder patients usually had a shorter life expectancy along with higher postoperative morbidity and mortality rates, they were considered by some as reasonable candidates for limited resections. Our results further indicated the role of age as a criterion for selection between the two sublobar resection types.

The RCT by LCSG was criticized by some as it included tumors 2-3 cm in size [2]. Some subsequent studies suggested that sublobar resection was a reasonable alternative for stage I lung cancer  $\leq 2$  cm in size [3-5, 16-18]. Based on these findings, there are two ongoing trials (JCOG0802 [19] and CALGB 140503) comparing sublobectomy to lobectomy in stage I  $\leq 2$  cm lung cancer. We found that in  $\leq 2$  cm invasive adenocarcinoma, OS following segmentectomy was significantly better than that after wedge resection, while survival outcomes were comparable between patients receiving segmentectomy or wedge resection in invasive adenocarcinoma 2-3 cm in size, supporting the application of segmentectomy in small-sized invasive lung adenocarcinoma.

Compared to lung adenocarcinoma, squamous cell carcinomas are more likely to show local aggressiveness and invasion of adjacent structures. To the best of knowledge, our study is the first to compare segmentectomy to wedge resection in this lung cancer histologic subtype. We found comparable OS and LCSS following segmentectomy or wedge resection in patients with squamous cell carcinoma in the whole cohort as well as in subgroup analysis stratified by age and tumor size, suggesting an equivalent efficacy of the two limited resection types in these tumors.

In conclusion, survival following segmentectomy or wedge resection was generally equivalent in lung invasive adenocarcinoma and squamous cell carcinoma. However, invasive adenocarcinoma patients who were  $\leq 65$  years or had tumors  $\leq 2$  cm in size may have improved survival outcomes after segmentectomy.

**Table 1: Characteristics of stage I ≤3 cm lung invasive adenocarcinoma and squamous cell carcinoma patients undergoing segmentectomy versus wedge resection**

| Variable                  | Invasive Adenocarcinoma |              |                   |          | Squamous Cell Carcinoma |              |              |          |
|---------------------------|-------------------------|--------------|-------------------|----------|-------------------------|--------------|--------------|----------|
|                           | Wedge<br>n=3145         | Seg<br>n=786 | P                 |          | Wedge<br>n=1579         | Seg<br>n=370 | P            |          |
|                           |                         |              | Unadjusted        | Adjusted |                         |              | Unadjusted   | Adjusted |
| <b>Age (years)</b>        |                         |              | 0.841             | 0.886    |                         |              | 0.414        | 0.641    |
| Mean                      | 69.1                    | 69.0         |                   |          | 71.7                    | 71.3         |              |          |
| SD                        | 9.7                     | 9.5          |                   |          | 8.3                     | 8.1          |              |          |
| <b>Gender</b>             |                         |              | <b>0.002</b>      | 0.528    |                         |              | 0.637        | 0.653    |
| Female                    | 1771<br>56.3%           | 490<br>62.3% |                   |          | 768<br>48.6%            | 185<br>50.0% |              |          |
| Male                      | 1374<br>43.7%           | 296<br>37.7% |                   |          | 811<br>51.4%            | 185<br>50.0% |              |          |
| <b>Race</b>               |                         |              | 0.051             | 0.333    |                         |              | 0.129        | 0.146    |
| White                     | 2739<br>87.1%           | 669<br>85.1% |                   |          | 1416<br>89.7%           | 324<br>87.6% |              |          |
| African American          | 287<br>9.1%             | 72<br>9.2%   |                   |          | 116<br>7.3%             | 38<br>10.3%  |              |          |
| Others and unknown        | 119<br>3.8%             | 45<br>5.7%   |                   |          | 47<br>3.0%              | 8<br>2.2%    |              |          |
| <b>Marital status</b>     |                         |              | 0.132             | 0.681    |                         |              | 0.100        | 0.901    |
| Married                   | 1668<br>53.0%           | 442<br>56.2% |                   |          | 794<br>50.3%            | 206<br>55.7% |              |          |
| Unmarried                 | 1348<br>42.9%           | 321<br>40.8% |                   |          | 728<br>46.1%            | 156<br>42.2% |              |          |
| Unknown                   | 129<br>4.1%             | 23<br>2.9%   |                   |          | 57<br>3.6%              | 8<br>2.2%    |              |          |
| <b>Year of diagnosis</b>  |                         |              | 0.587             | 0.789    |                         |              | 0.415        | 0.318    |
| 1998-2004                 | 1072<br>34.1%           | 276<br>35.1% |                   |          | 566<br>35.8%            | 141<br>38.1% |              |          |
| 2005-2012                 | 2073<br>65.9%           | 510<br>64.9% |                   |          | 1013<br>64.2%           | 229<br>61.9% |              |          |
| <b>Tumor size (mm)</b>    |                         |              | <b>&lt; 0.001</b> | 0.808    |                         |              | <b>0.001</b> | 0.801    |
| Mean                      | 17.2                    | 18.6         |                   |          | 18.2                    | 19.5         |              |          |
| SD                        | 6.3                     | 6.5          |                   |          | 6.4                     | 5.9          |              |          |
| <b>Lobar distribution</b> |                         |              | <b>&lt; 0.001</b> | 0.237    |                         |              | 0.323        | 0.301    |
| Upper                     | 2057<br>65.4%           | 483<br>61.5% |                   |          | 1045<br>66.2%           | 242<br>65.4% |              |          |
| Middle                    | 124<br>3.9%             | 15<br>1.9%   |                   |          | 51<br>3.2%              | 7<br>1.9%    |              |          |
| Lower                     | 964<br>30.7%            | 288<br>36.6% |                   |          | 483<br>30.6%            | 121<br>32.7% |              |          |

(Continued)

| Variable                          | Invasive Adenocarcinoma |              |                   |          | Squamous Cell Carcinoma |              |                   |          |
|-----------------------------------|-------------------------|--------------|-------------------|----------|-------------------------|--------------|-------------------|----------|
|                                   | Wedge<br>n=3145         | Seg<br>n=786 | <i>P</i>          |          | Wedge<br>n=1579         | Seg<br>n=370 | <i>P</i>          |          |
|                                   |                         |              | Unadjusted        | Adjusted |                         |              | Unadjusted        | Adjusted |
| <b>Differentiation</b>            |                         |              | 0.988             | 0.683    |                         |              | 0.432             | 0.425    |
| Well                              | 606<br>19.3%            | 149<br>19.0% |                   |          | 79<br>5.0%              | 11<br>3.0%   |                   |          |
| Moderate                          | 1481<br>47.1%           | 378<br>48.1% |                   |          | 744<br>47.1%            | 181<br>48.9% |                   |          |
| Poor                              | 839<br>26.7%            | 204<br>26.0% |                   |          | 668<br>42.3%            | 160<br>43.2% |                   |          |
| Undifferentiated                  | 22<br>0.7%              | 6<br>0.8%    |                   |          | 17<br>1.1%              | 5<br>1.4%    |                   |          |
| Unknown                           | 197<br>6.3%             | 49<br>6.2%   |                   |          | 71<br>4.5%              | 13<br>3.5%   |                   |          |
| <b>Number of LNs<br/>examined</b> |                         |              | <b>&lt; 0.001</b> | NA       |                         |              | <b>&lt; 0.001</b> | NA       |
| ≤ 6                               | 2594<br>82.5%           | 573<br>72.9% |                   |          | 1375<br>87.1%           | 286<br>77.3% |                   |          |
| 7 or more                         | 367<br>11.7%            | 137<br>17.4% |                   |          | 129<br>8.2%             | 63<br>17.0%  |                   |          |
| Unknown                           | 184<br>5.9%             | 76<br>9.7%   |                   |          | 75<br>4.7%              | 21<br>5.7%   |                   |          |
| <b>Radiation</b>                  |                         |              | <b>0.009</b>      | NA       |                         |              | <b>0.013</b>      | NA       |
| Yes                               | 206<br>6.6%             | 32<br>4.1%   |                   |          | 122<br>7.7%             | 15<br>4.1%   |                   |          |
| No                                | 2939<br>93.4%           | 754<br>95.9% |                   |          | 1457<br>92.3%           | 355<br>95.9% |                   |          |

Abbreviations: Seg, segmentectomy; SD, standard deviation; LN, lymph nodes; NA, not adjusted.

**Table 2: Propensity score-matched analysis comparing overall survival and lung cancer-specific survival following segmentectomy versus wedge resection**

| Model               | Invasive Adenocarcinoma |              |                      |              | Squamous Cell Carcinoma |          |                      |          |
|---------------------|-------------------------|--------------|----------------------|--------------|-------------------------|----------|----------------------|----------|
|                     | OS                      |              | LCSS                 |              | OS                      |          | LCSS                 |          |
|                     | HR<br>95% CI            | <i>P</i>     | HR<br>95% CI         | <i>P</i>     | HR<br>95% CI            | <i>P</i> | HR<br>95% CI         | <i>P</i> |
| <b>All patients</b> | 0.871<br>0.746-1.016    | 0.078        | 0.918<br>0.755-1.116 | 0.388        | 1.001<br>0.818-1.225    | 0.993    | 1.082<br>0.818-1.430 | 0.582    |
| <b>Age (yrs)</b>    |                         |              |                      |              |                         |          |                      |          |
| ≤ 65                | 0.626<br>0.457-0.858    | <b>0.004</b> | 0.643<br>0.440-0.939 | <b>0.022</b> | 0.715<br>0.417-1.224    | 0.221    | 0.749<br>0.355-1.583 | 0.449    |
| > 65                | 0.997<br>0.835-1.192    | 0.978        | 1.040<br>0.827-1.309 | 0.736        | 0.981<br>0.786-1.224    | 0.865    | 1.042<br>0.749-1.448 | 0.808    |

(Continued)

| Model     | Invasive Adenocarcinoma |              |                      |          | Squamous Cell Carcinoma |          |                      |          |
|-----------|-------------------------|--------------|----------------------|----------|-------------------------|----------|----------------------|----------|
|           | OS                      |              | LCSS                 |          | OS                      |          | LCSS                 |          |
|           | HR<br>95% CI            | <i>P</i>     | HR<br>95% CI         | <i>P</i> | HR<br>95% CI            | <i>P</i> | HR<br>95% CI         | <i>P</i> |
| Size (cm) |                         |              |                      |          |                         |          |                      |          |
| ≤2        | 0.811<br>0.666-0.988    | <b>0.038</b> | 0.813<br>0.632-1.047 | 0.109    | 0.915<br>0.659-1.271    | 0.597    | 0.993<br>0.621-1.585 | 0.975    |
| 2-3       | 0.865<br>0.674-1.111    | 0.256        | 1.083<br>0.792-1.482 | 0.616    | 0.860<br>0.633-1.168    | 0.333    | 0.738<br>0.485-1.122 | 0.156    |

Abbreviations: OS, overall survival; LCSS, lung cancer-specific survival; HR, hazard ratio; CI, confidence interval.

## MATERIALS AND METHODS

We used the SEER\*Stat software version 8.2.1-alpha to obtain the SEER database (1988-2012) through on-line access. This study was approved by the Institutional Review Board of Fudan University Shanghai Cancer Center.

We only included patients with lung cancer as the first primary malignancy. As SEER codes for wedge resection (Code 21) or segmentectomy (Code 22) were not available until 1998, patients diagnosed before 1998 were excluded. Tumors should be stage I and ≤ 30 mm in diameter. Cases were excluded if they did not have sufficient information on tumor size or pathologic stage, or if they received radiation therapy prior to surgery. In the current lung adenocarcinoma classification proposed by the International Association for the Study of Lung Cancer, the American Thoracic Society, and the European Respiratory Society (IASLC/ATS/ERS) [11], non-mucinous bronchioloalveolar carcinoma (BAC) could potential be adenocarcinoma in situ (AIS) or minimally invasive adenocarcinoma (MIA). As AIS and MIA have extremely good survival rates after resection [12, 13], we excluded non-mucinous BAC and only included invasive adenocarcinoma and squamous cell carcinoma in this study. Patients with other NSCLC histologic types were excluded because of limited number of cases. The following clinicopathologic data were retrieved in this study: age at diagnosis, gender, ethnicity, marital status, year of diagnosis, tumor location, type of surgical resection, number of lymph nodes examined, tumor size, disease stage, tumor histology, tumor grade, information of radiation therapy, overall survival (OS) and lung cancer-specific survival (LCSS).

### Statistical analysis

We used Pearson's chi-squared test or Fisher's exact test to assess the association between type of resection and a categorical variable. Age and tumor size were treated as continuous variables and were compared using independent

sample *t* test. To adjust for the potential differences in the baseline characteristics between patients undergoing wedge resection or segmentectomy, we used propensity score matching methods. Propensity scores were calculated using logistic regression including preoperative variables: age, sex, race, year of diagnosis, marital status, tumor location, size and grade. Patients receiving segmentectomy and wedge resection were matched 1:1 based on their propensity scores, and Cox regression multivariate survival analysis adjusting for all the clinicopathologic variables was performed to compare the OS and LCSS of patients receiving segmentectomy versus wedge resection. Hazard ratio (HR) and its 95% confidence interval (CI) along with *P* values were calculated. All the tests were conducted in Stata (version SE/11, StataCorp, Texas). A two-tailed *P* value < 0.05 was set as statistically significant.

## CONFLICTS OF INTEREST

The authors declare no conflicts of interest.

### Author contributions

Y.Z. designed this study, collected and analyzed data and wrote the main manuscript. H.C. and Y.S. designed and directed the overall project. All authors reviewed the manuscript.

## REFERENCES

1. National Lung Screening Trial Research T, Aberle DR, Adams AM, Berg CD, Black WC, Clapp JD, Fagerstrom RM, Gareen IF, Gatsonis C, Marcus PM, Sicks JD. Reduced lung-cancer mortality with low-dose computed tomographic screening. *New England Journal of Medicine*. 2011; 365:395-409.
2. Ginsberg RJ, Rubinstein LV. Randomized trial of lobectomy versus limited resection for T1 N0 non-small cell lung cancer. Lung Cancer Study Group. *Ann Thorac Surg*. 1995; 60:615-622; discussion 622-613.

3. Koike T, Yamato Y, Yoshiya K, Shimoyama T, Suzuki R. Intentional limited pulmonary resection for peripheral T1 N0 M0 small-sized lung cancer. *J Thorac Cardiovasc Surg.* 2003; 125:924-928.
4. Watanabe T, Okada A, Imakiire T, Koike T, Hirono T. Intentional limited resection for small peripheral lung cancer based on intraoperative pathologic exploration. *Jpn J Thorac Cardiovasc Surg.* 2005; 53:29-35.
5. Okada M, Koike T, Higashiyama M, Yamato Y, Kodama K, Tsubota N. Radical sublobar resection for small-sized non-small cell lung cancer: a multicenter study. *J Thorac Cardiovasc Surg.* 2006; 132:769-775.
6. Sugi K, Kobayashi S, Sudou M, Sakano H, Matsuda E, Okabe K. Long-term prognosis of video-assisted limited surgery for early lung cancer. *Eur J Cardiothorac Surg.* 2010; 37:456-460.
7. Tsutani Y, Miyata Y, Nakayama H, Okumura S, Adachi S, Yoshimura M, Okada M. Oncologic outcomes of segmentectomy compared with lobectomy for clinical stage IA lung adenocarcinoma: propensity score-matched analysis in a multicenter study. *J Thorac Cardiovasc Surg.* 2013; 146:358-364.
8. Veluswamy RR, Ezer N, Mhango G, Goodman E, Bonomi M, Neugut AI, Swanson S, Powell CA, Beasley MB, Wisnivesky JP. Limited Resection Versus Lobectomy for Older Patients With Early-Stage Lung Cancer: Impact of Histology. *J Clin Oncol.* 2015.
9. Smith CB, Swanson SJ, Mhango G, Wisnivesky JP. Survival after segmentectomy and wedge resection in stage I non-small-cell lung cancer. *J Thorac Oncol.* 2013; 8:73-78.
10. Koike T, Koike T, Yoshiya K, Tsuchida M, Toyabe S. Risk factor analysis of locoregional recurrence after sublobar resection in patients with clinical stage IA non-small cell lung cancer. *J Thorac Cardiovasc Surg.* 2013; 146:372-378.
11. Travis WD, Brambilla E, Noguchi M, Nicholson AG, Geisinger KR, Yatabe Y, Beer DG, Powell CA, Riely GJ, Van Schil PE, Garg K, Austin JH, Asamura H, et al. International association for the study of lung cancer/american thoracic society/european respiratory society international multidisciplinary classification of lung adenocarcinoma. *J Thorac Oncol.* 2011; 6:244-285.
12. Yoshizawa A, Motoi N, Riely GJ, Sima CS, Gerald WL, Kris MG, Park BJ, Rusch VW, Travis WD. Impact of proposed IASLC/ATS/ERS classification of lung adenocarcinoma: prognostic subgroups and implications for further revision of staging based on analysis of 514 stage I cases. *Mod Pathol.* 2011; 24:653-664.
13. Zhang Y, Sun Y, Xiang J, Zhang Y, Hu H, Chen H. A clinicopathologic prediction model for postoperative recurrence in stage Ia non-small cell lung cancer. *J Thorac Cardiovasc Surg.* 2014; 148:1193-1199.
14. Subramanian J, Morgensztern D, Goodgame B, Baggstrom MQ, Gao F, Piccirillo J, Govindan R. Distinctive characteristics of non-small cell lung cancer (NSCLC) in the young: a surveillance, epidemiology, and end results (SEER) analysis. *J Thorac Oncol.* 2010; 5:23-28.
15. Bassily MN, Wilson R, Pompei F, Burmistrov D. Cancer survival as a function of age at diagnosis: a study of the Surveillance, Epidemiology and End Results database. *Cancer Epidemiol.* 2010; 34:667-681.
16. Okumura M, Goto M, Ideguchi K, Tamura M, Sasaki H, Tanaka H, Matsumura A, Iuchi K. Factors associated with outcome of segmentectomy for non-small cell lung cancer: long-term follow-up study at a single institution in Japan. *Lung Cancer.* 2007; 58:231-237.
17. Yamashita S, Tokuishi K, Anami K, Moroga T, Miyawaki M, Chujo M, Yamamoto S, Kawahara K. Thoracoscopic segmentectomy for T1 classification of non-small cell lung cancer: a single center experience. *Eur J Cardiothorac Surg.* 2012; 42:83-88.
18. Zhang L, Ma W, Li Y, Jiang Y, Ma G, Wang G. Comparative study of the anatomic segmentectomy versus lobectomy for clinical stage IA peripheral lung cancer by video assistant thoracoscopic surgery. *J Cancer Res Ther.* 2013; 9:S106-109.
19. Nakamura K, Saji H, Nakajima R, Okada M, Asamura H, Shibata T, Nakamura S, Tada H, Tsuboi M. A phase III randomized trial of lobectomy versus limited resection for small-sized peripheral non-small cell lung cancer (JCOG0802/WJOG4607L). *Jpn J Clin Oncol.* 2010; 40:271-274.
